# Supplementary material for: Temperature-dependent nanomorphology–performance relations in binary iridium complex blend films for organic light emitting diodes
Source: Royal Society of Chemistry journal article supplement (doi:10.1039/c5cp03436a), 2015-01-01
Supplement: c5cp03436a1.pdf [file c5cp03436a1.pdf]

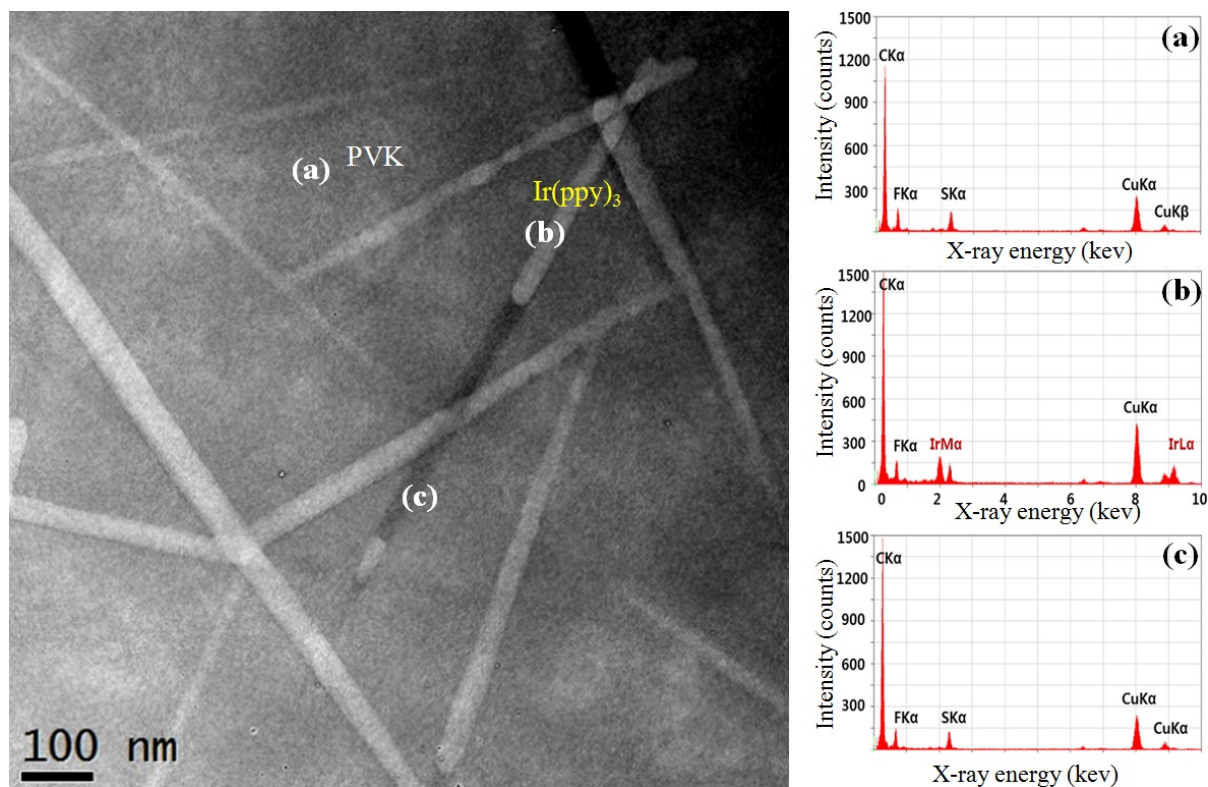

**Fig. S1.** (S)TEM-HAADF image taken from a thermally annealed PVK:Ir(ppy)<sub>3</sub> at 150 °C showing the local contrast change of the needle-like features and the corresponding EDS results acquired from (a) PVK, (b) and (c) needle-like features, respectively.
